# Supplementary material
Source: Springer Nature journal article supplement (https://www.springermedizin.de/resource/supplementary/12958_2008_484_MOESM2_ESM.pdf/9568056)

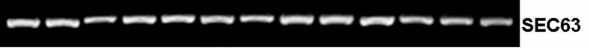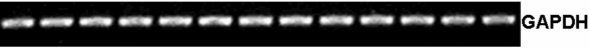

B Lu H Li Sp K M SI Sk T E O U

Supplement: MOESM2 [file 9568056]
